# Supplementary material for: Towards new proton exchange membrane materials with enhanced performance via RAFT polymerization
Source: Royal Society of Chemistry journal article supplement (doi:10.1039/c5py01527h), 2015-11-25
Supplement: c5py01527h1.pdf [file c5py01527h1.pdf]

## Electronic Supplementary Information (ESI)

### Towards New Proton Exchange Membrane Materials with Enhanced Performance via RAFT Polymerization

Gökçe Çelik, Murat Barsbay, Olgun Güven

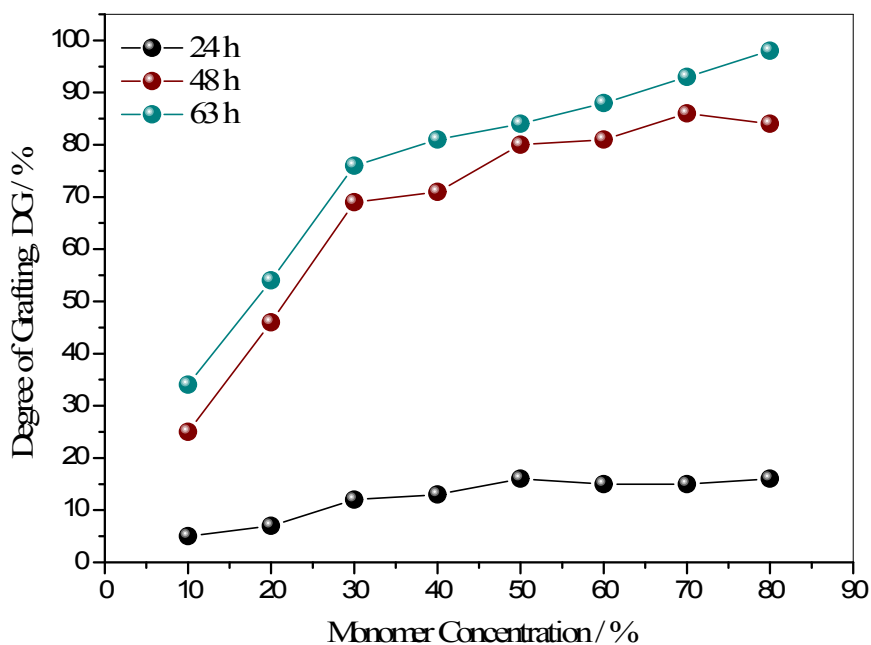

**Fig. S1** Change in degree of grafting (DG) versus monomer concentration (% v/v) attained at various reaction times during  $\gamma$ -initiated graft polymerization of styrene (St) from ETFE mediated via the RAFT agent cumyl phenyldithioacetate (CPDA); [St]:[CPDA]=700:1, ETFE (ca. 0.02 g), dose rate=0.032 kGy<sup>-1</sup>, in toluene, at room temperature.

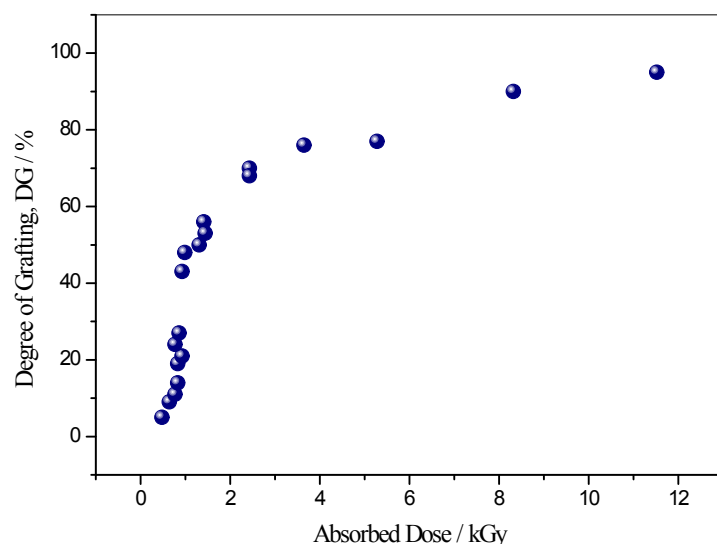

**Fig. S2** Change in degree of grafting (DG) versus absorbed dose during  $\gamma$ -initiated graft polymerization of styrene (St) from ETFE mediated via the RAFT agent cumyl phenyldithioacetate (CPDA); [St]:[CPDA]=700:1, [St]=2.62 mol·L<sup>-1</sup> (30 % St, v/v), ETFE (ca. 0.02 g), dose rate=0.032 kGy·h<sup>-1</sup>, in toluene, at room temperature.

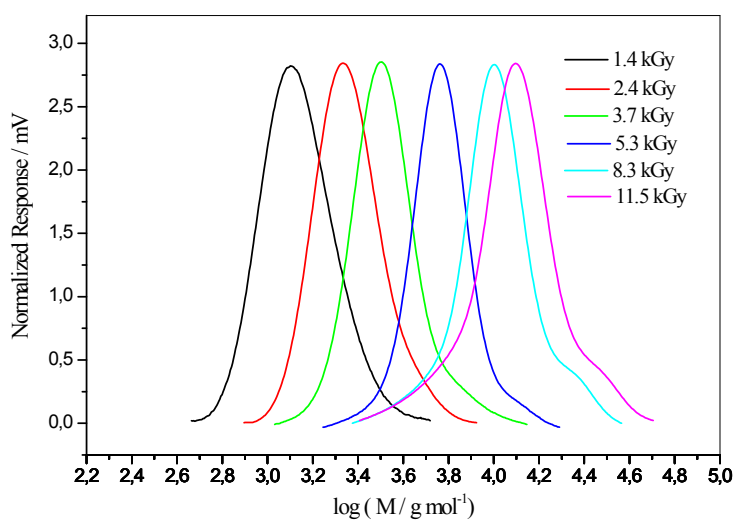

**Fig. S3** Evolution of molecular weight distribution versus absorbed radiation dose for free polystyrene formed during  $\gamma$ -initiated graft polymerization of styrene (St) from ETFE mediated via the RAFT agent cumyl phenyldithioacetate (CPDA); [St]:[CPDA]=700:1, [St]=2.62 molL<sup>-1</sup> (30 % St, v/v), ETFE (ca. 0.02 g), dose rate=0.032 kGyh<sup>-1</sup>, in toluene, at room temperature

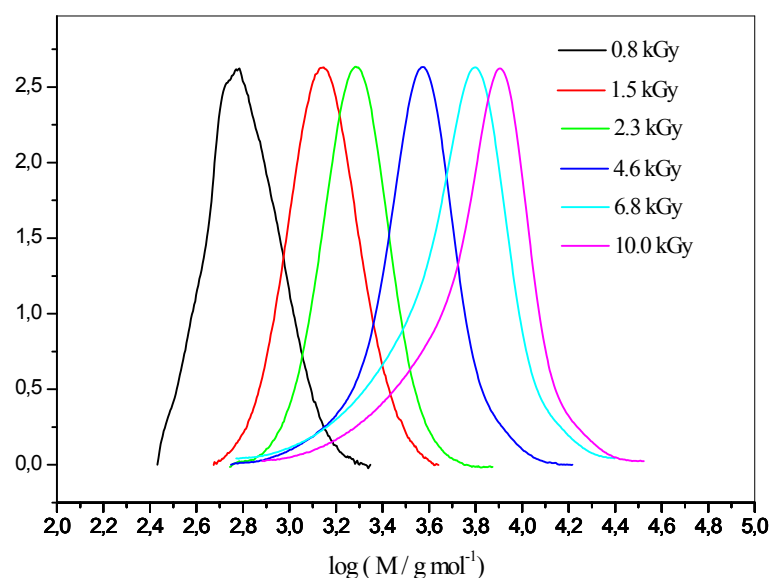

**Fig. S4** Evolution of molecular weight distribution versus absorbed radiation dose for free polystyrene formed during  $\gamma$ -initiated graft polymerization of styrene (St) from ETFE mediated via the RAFT agent cumyl phenyldithioacetate (CPDA); [St]:[CPDA]=700:1, [St]=0.87 molL<sup>-1</sup> (10% St, v/v), ETFE (ca. 0.02 g), dose rate=0.032 kGyh<sup>-1</sup>, in toluene, at room temperature.

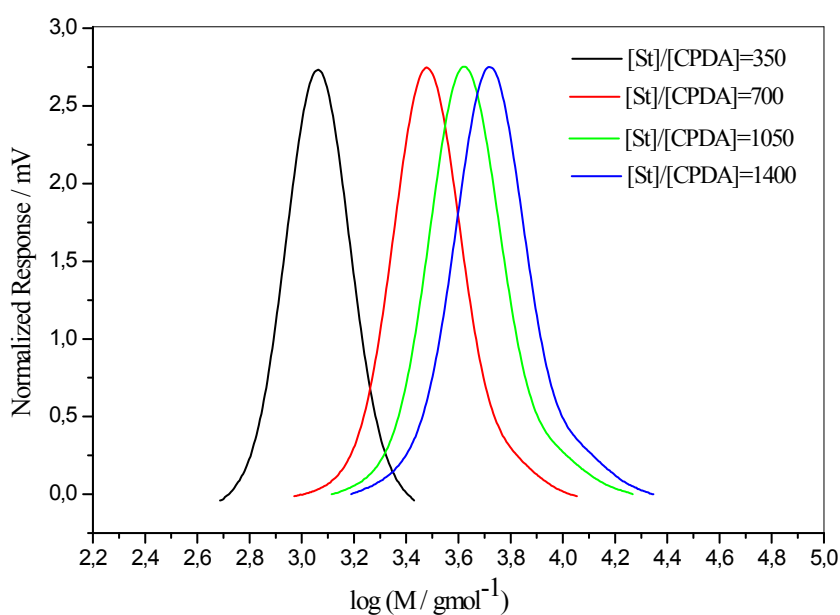

**Fig. S5** Evolution of molecular weight distribution versus the RAFT agent concentration for free polystyrene formed during  $\gamma$ -initiated graft polymerization of styrene (St) from ETFE mediated via the RAFT agent cumyl phenyldithioacetate (CPDA); polymerization time = 97 h (absorbed radiation dose = 3.1 kGy), [St]=2.62 molL<sup>-1</sup> (30 % St, v/v), ETFE (ca. 0.02 g), dose rate=0.032 kGy·h<sup>-1</sup>, in toluene, at room temperature.

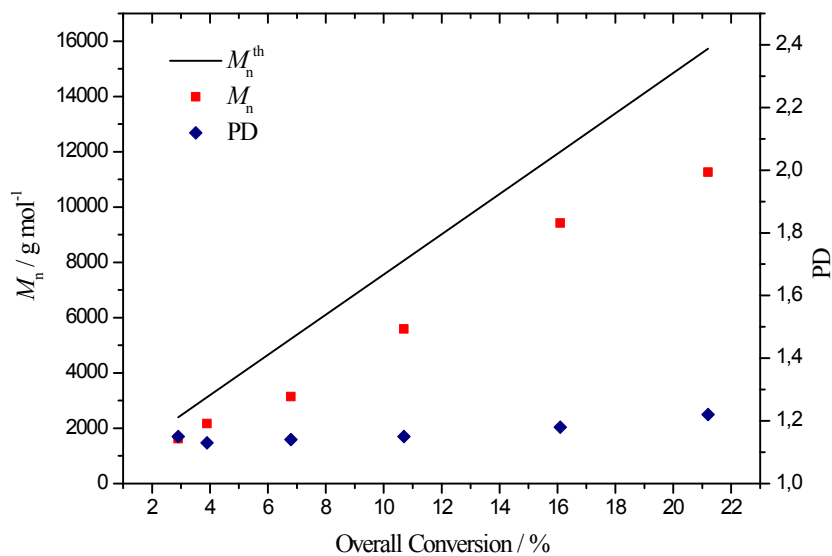

**Fig. S6** Evolution of number-average molecular weight ( $M_n$ ) and polydispersity (PD) as a function of monomer conversion for free polystyrene formed during  $\gamma$ -initiated graft polymerization of styrene (St) from ETFE mediated via the RAFT agent cumyl phenyldithioacetate (CPDA);  $[\text{St}]:[\text{CPDA}]=700:1$ ,  $[\text{St}]=2.62 \text{ molL}^{-1}$  (30% St, v/v), ETFE (ca. 0.02 g), dose rate= $0.032 \text{ kGyh}^{-1}$ , in toluene, at room temperature.

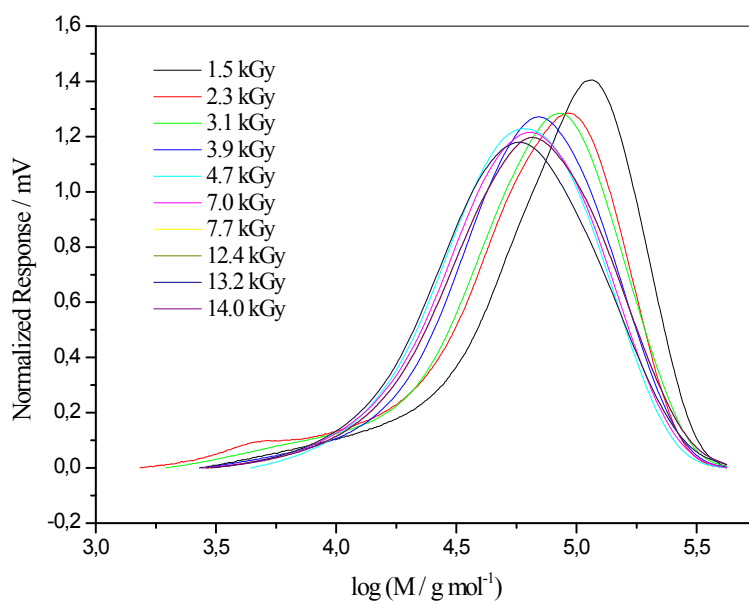

**Fig. S7** Evolution of molecular weight distribution versus absorbed radiation dose for free polystyrene formed during conventional  $\gamma$ -initiated graft polymerization of styrene (St) from ETFE:  $[\text{St}]=2.62 \text{ molL}^{-1}$  (30% St, v/v), ETFE (ca. 0.02 g), dose rate= $0.032 \text{ kGyh}^{-1}$ , in toluene, at room temperature.

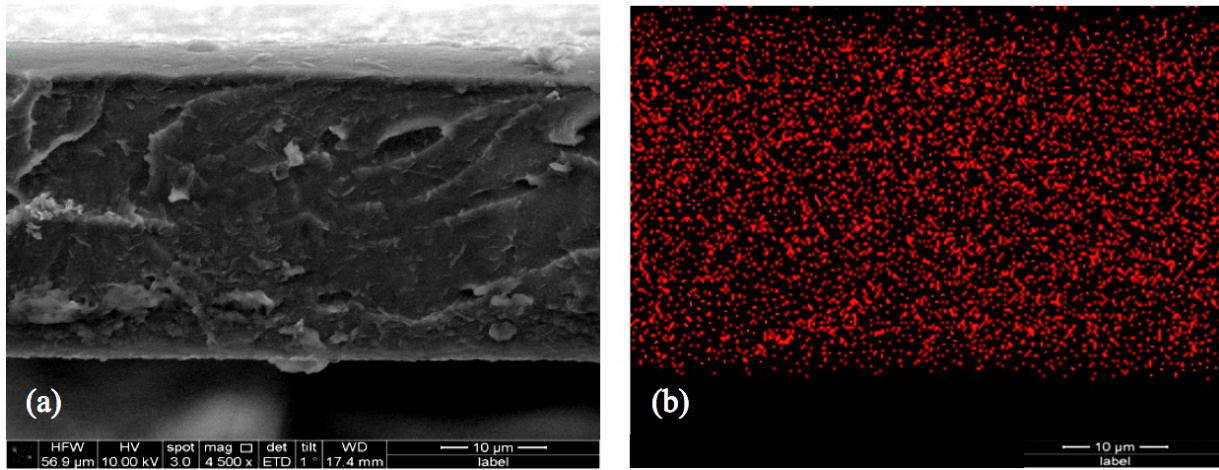

**Fig. S8** (a) SEM and (b) corresponding SEM-EDX dot mapping illustrating the distribution of sulfur atoms across the cross-section of ETFE-*g*-PSSA, DG: 26%.

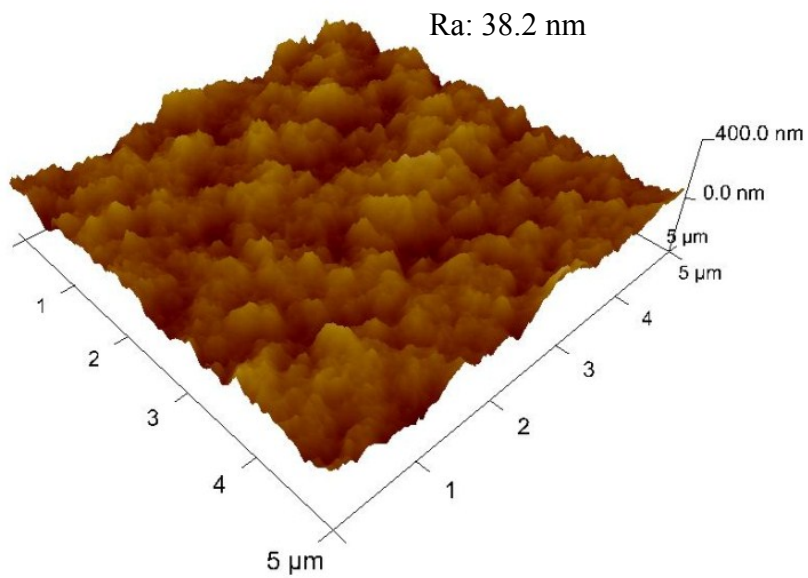

**Fig. S9** AFM image and roughness (Ra) of pristine (non-pressed) ETFE film

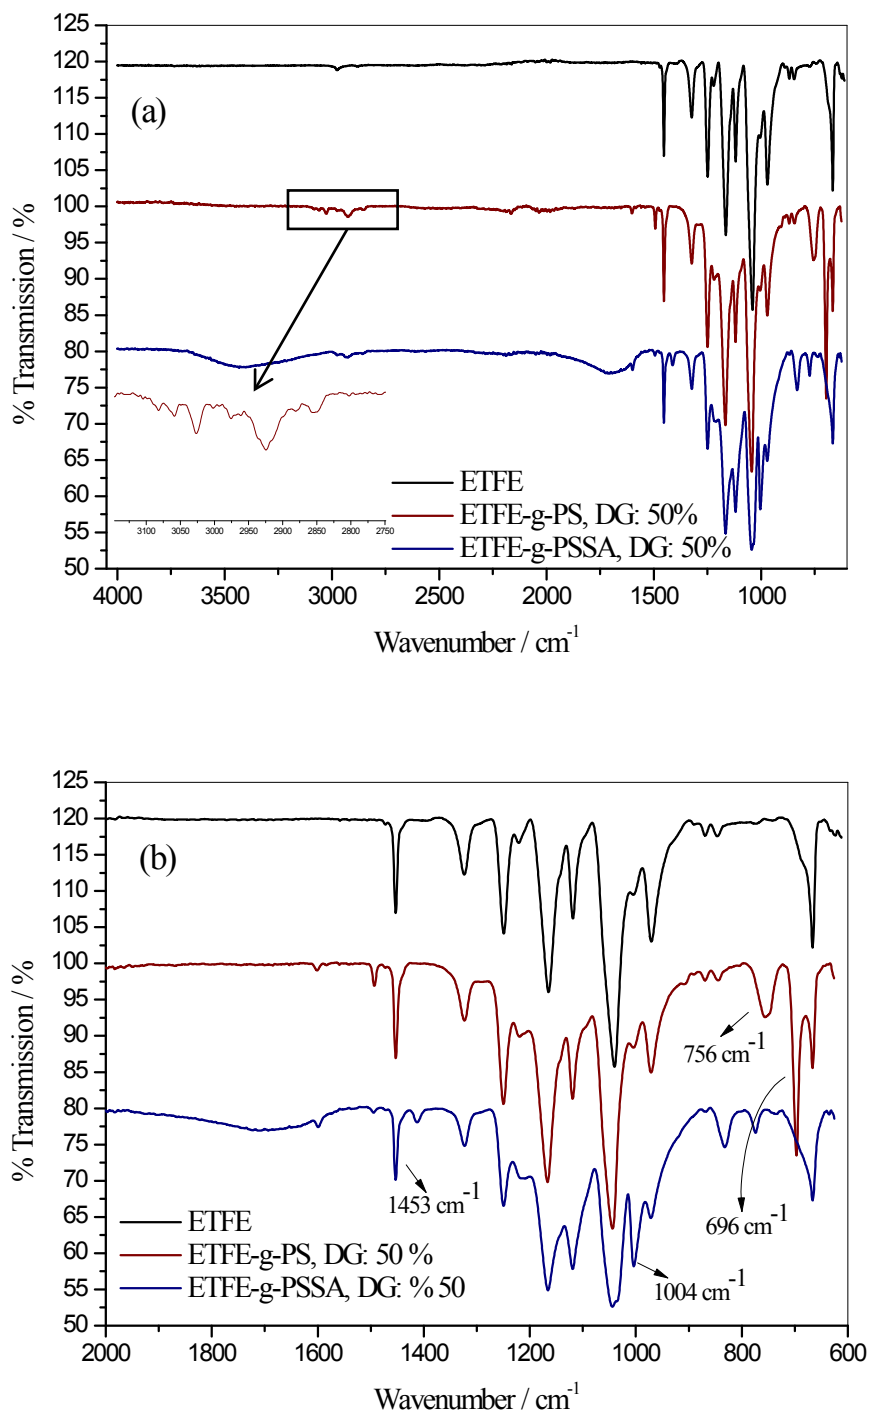

**Fig. S10** ATR-FTIR spectra of pristine ETFE, ETFE-g-PS film with 50% degree of grafting. (a) 600–4000 cm<sup>-1</sup> region, (b) 600–2000 cm<sup>-1</sup> region. The inset in Figure S10a are the magnified characteristic peaks of PS at 3002, 3027, 3059, 3082, 3104, 2855 and 2925 cm<sup>-1</sup>

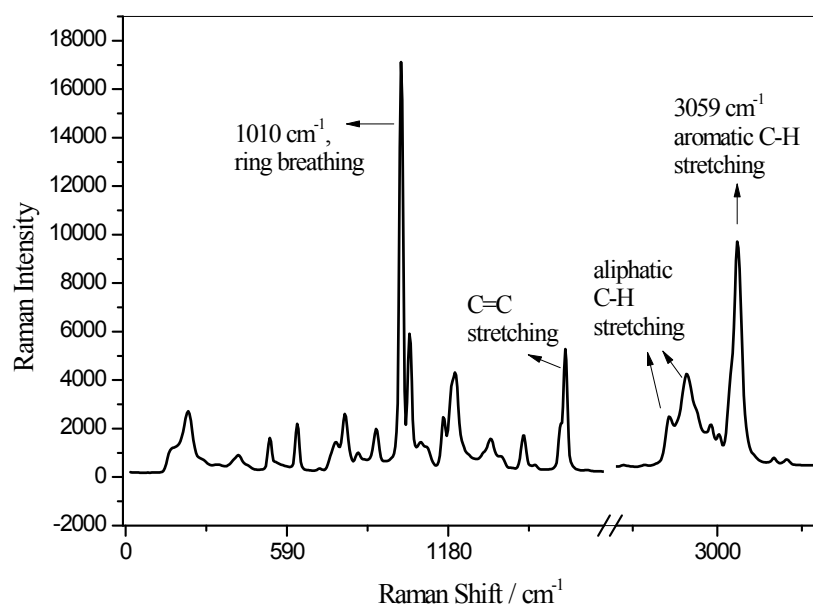

**Fig. S11** Raman spectrum of pure polystyrene (PS)

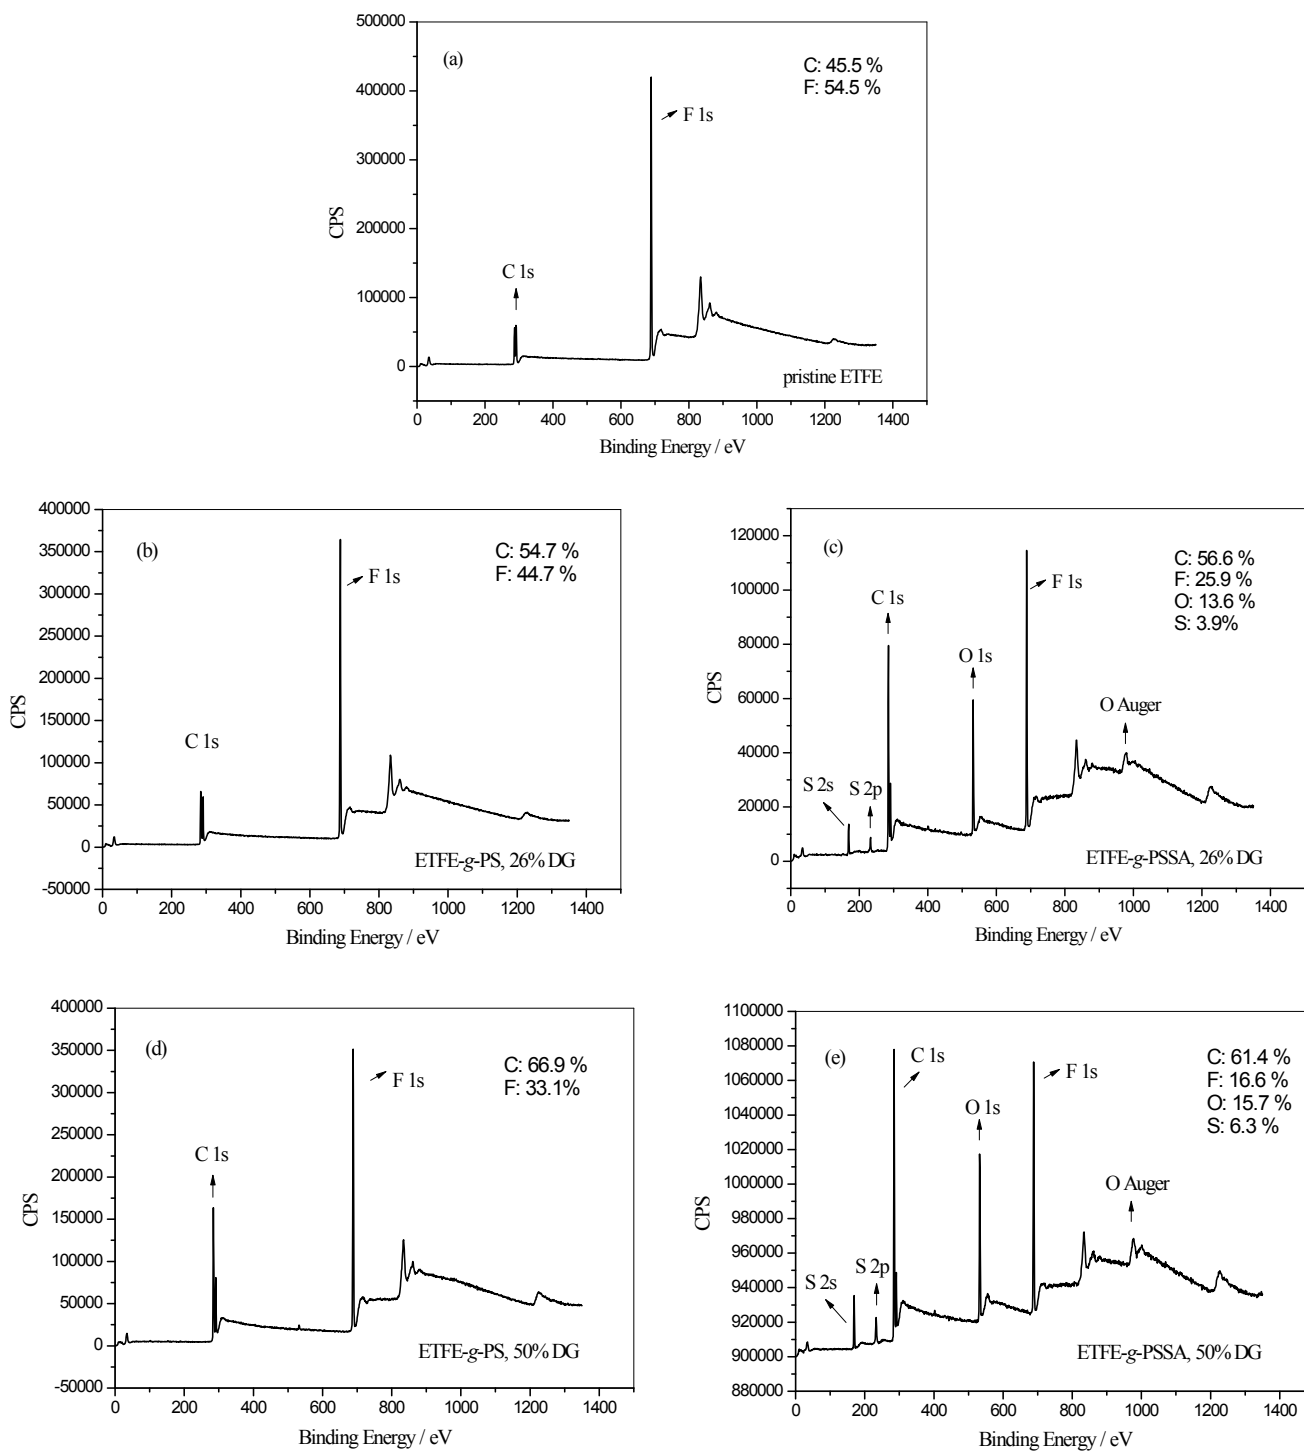

**Fig. S12** XPS wide-scan survey spectra of (a) pristine ETFE, (b) ETFE-g-PS film with 26% degree of grafting (DG) and (c) its sulfonated membrane, (d) ETFE-g-PS film with 50% degree of grafting (DG) and (e) its sulfonated membrane.



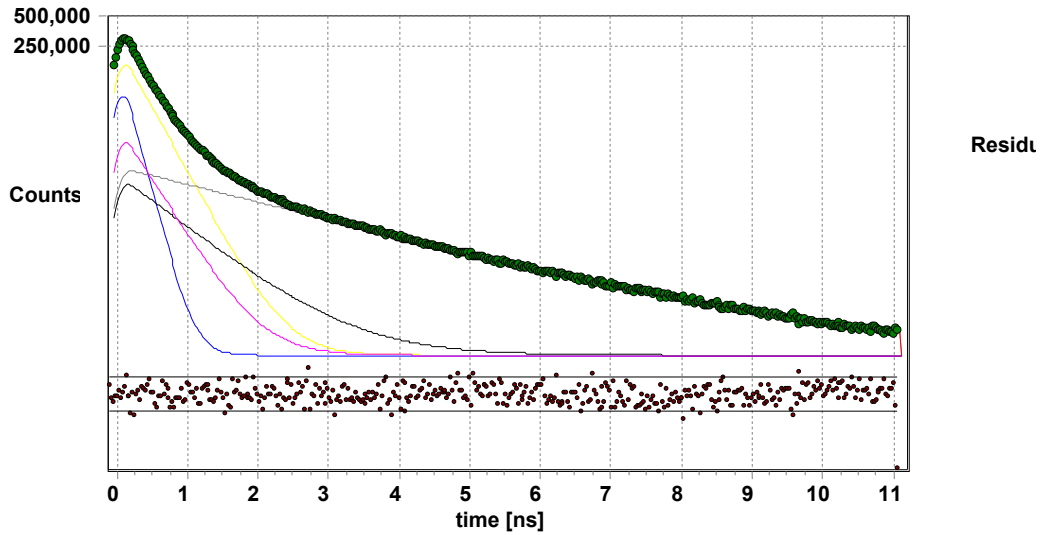

**Fig. S13** A typical positron annihilation lifetime (PAL) spectrum for the ETFE-*g*-PS film with 17% degree of grafting (DG). The dark green curve (topmost) is the total lifetime spectrum. The blue curve is for  $\tau_2$ . The yellow and black curves correspond to ortho-Ps annihilated in crystalline ( $\tau_3$ ) and amorphous ( $\tau_4$ ) domains, respectively.

**Tao-Eldrup Equation:**

$$\tau = \frac{1}{2} \left[ 1 - \frac{R}{R + \Delta R} + \frac{1}{2\pi} \sin \left( \frac{2\pi R}{R + \Delta R} \right) \right]^{-1} \quad (1)$$

Where  $\tau$  is lifetime of positronium (ns),  $R$  is radius of free volume (nm) and  $\Delta R$  is empirical electron layer thickness (0.1656 nm)<sup>1,2</sup>.

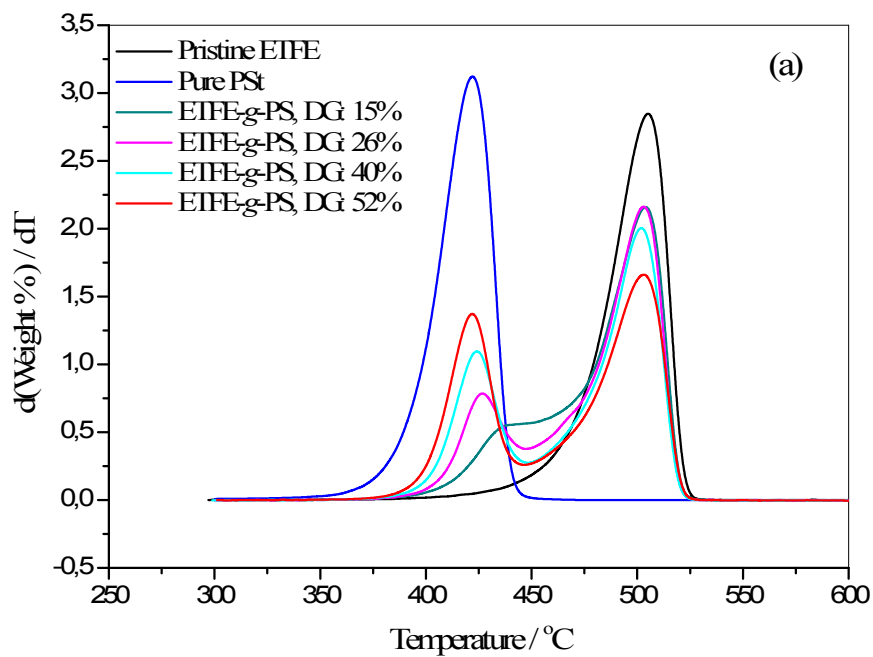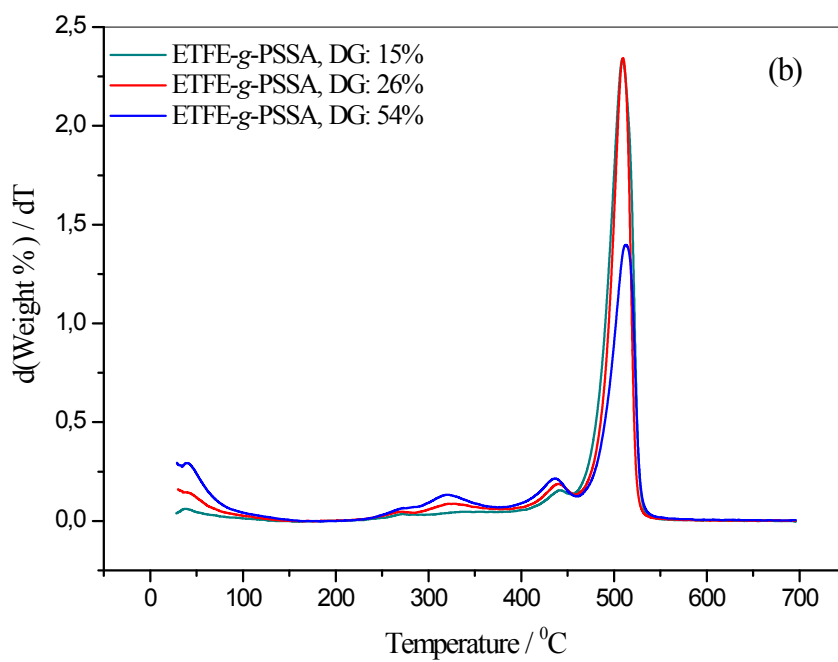

**Fig. S14** Derivative thermogravimetry curves of (a) pristine ETFE, pure PS and PS-grafted films with various degree of grafting (DG) and (b) sulfonated membranes with various DGs.

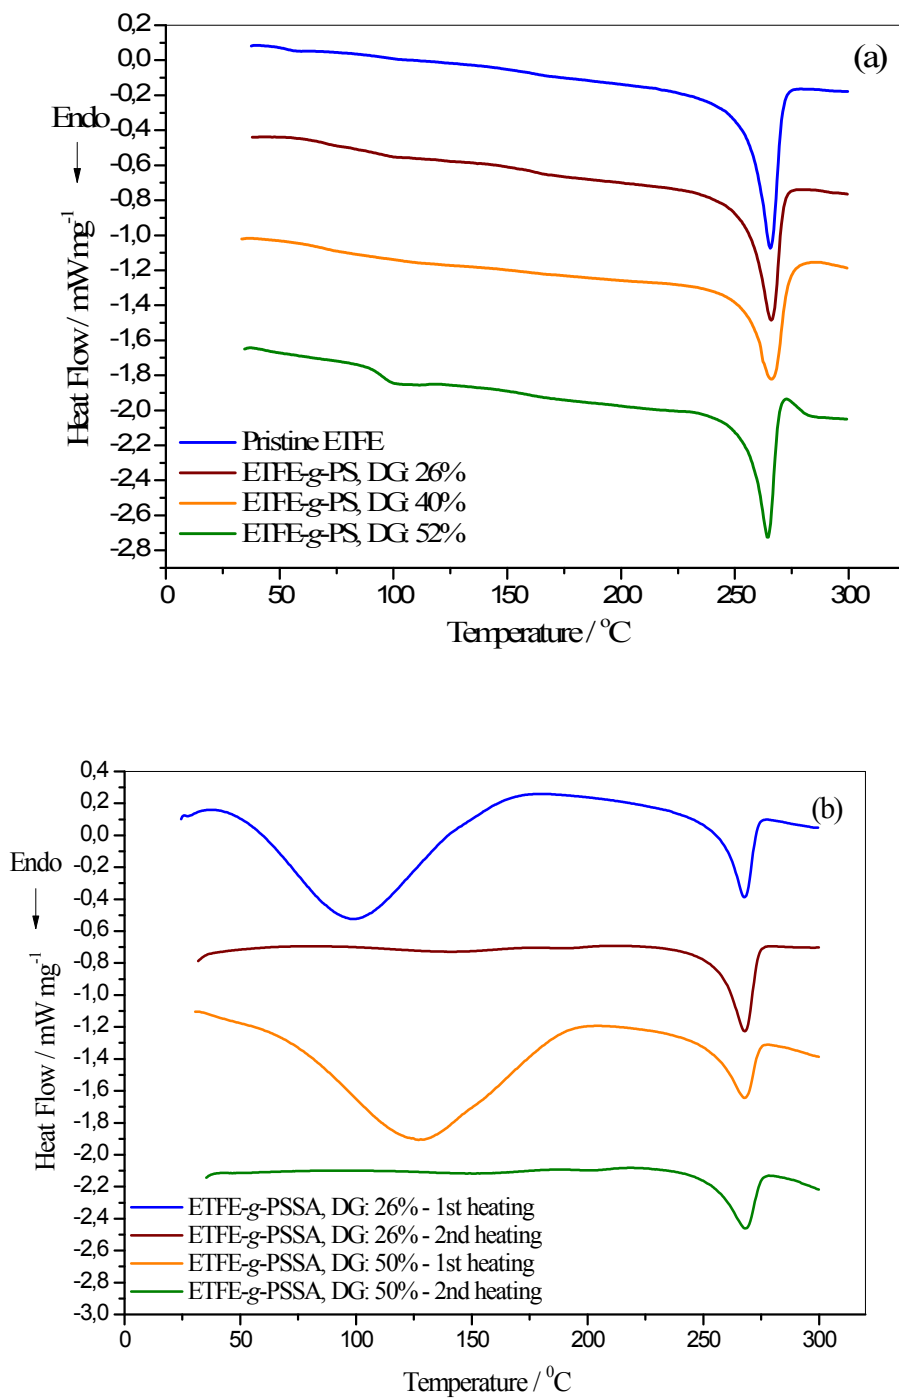

**Fig. S15** DSC curves of (a) pristine ETFE and PS-grafted films with various degrees of grafting (DG) and (b) sulfonated membranes with various DGs.

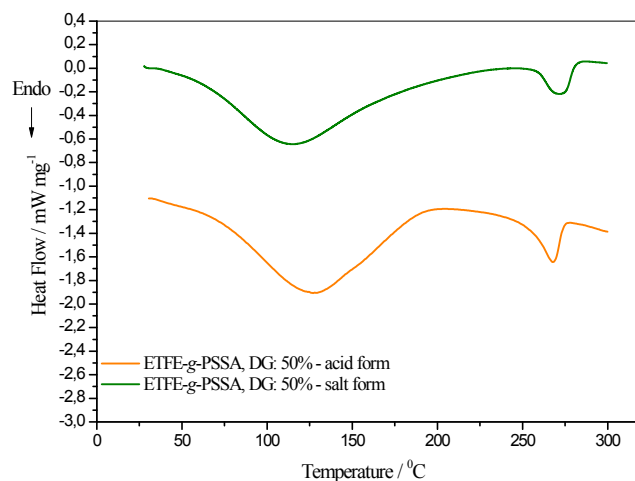

**Fig. S16** DSC curves of ETFE-*g*-PSSA membrane with degree of grafting (DG) of 50% before and after converting the acid form of the membrane to the salt form according to recipe in Ref. 3.

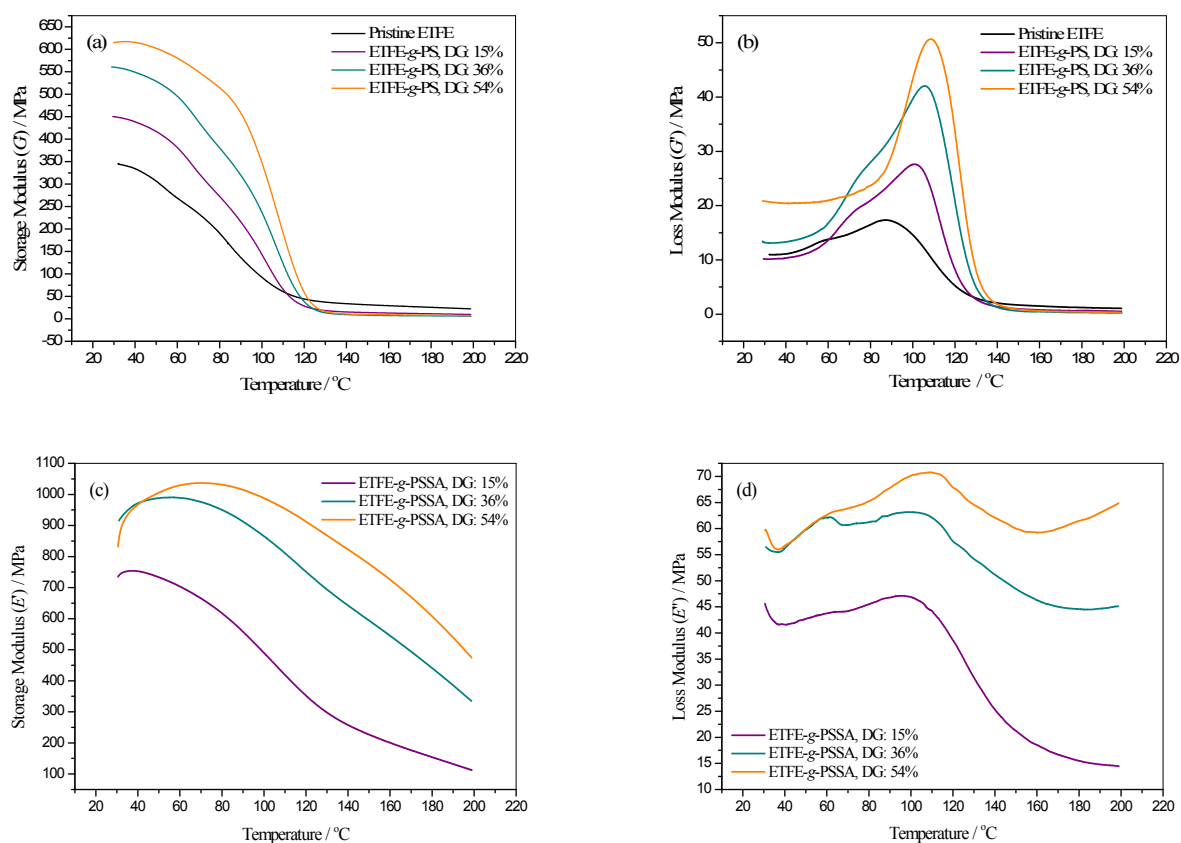

**Fig. S17** Storage modulus and loss modulus curves of pristine and PS-grafted ETFE films (a and b, respectively) and sulfonated membranes (c and d, respectively).

#### References for the Electronic Supplementary Information (ESI)

1. S. J. Tao, *J. Chem. Phys.*, 1972, **56**, 5499–20.
2. M. Eldrup, D. Lightbody, J. N. Sherwood, *Chem. Phys.*, 1981, **63**, 51.
3. S. A. Gürsel, J. Schneider, H. B. Youcef, A. Wokaun, G. G. Scherer, *J. Appl. Polym. Sci.* 2008, **108**, 3577–3585
